# Supplementary material
Source: MDPI journal article supplement (https://www.mdpi.com/1996-1073/15/15/5569)
Supplement: s1 [file s1]

Supplementary  
Lithium Producing Countries 2010-2022<sup>a</sup>  
(thousand tons)

| Year              | Countries         |                   |                  |                   |                  |                       |                   |                |               |
|-------------------|-------------------|-------------------|------------------|-------------------|------------------|-----------------------|-------------------|----------------|---------------|
| 2010              | Chile<br>10.51    | Australia<br>9.26 | China<br>3.95    | Argentina<br>2.95 | Portugal<br>0.8  | Zimbabwe<br>0.47      | Brazil<br>0.16    |                |               |
| 2011              | Chile<br>12.9     | Australia<br>12.5 | China<br>4.14    | Argentina<br>2.95 | Portugal<br>0.82 | Zimbabwe<br>0.47      | Brazil<br>0.32    |                |               |
| 2012              | Chile<br>13.2     | Australia<br>12.8 | China<br>4.5     | Argentina<br>2.7  | Zimbabwe<br>1.06 | Portugal<br>0.560     | Brazil<br>0.15    |                |               |
| 2013              | Australia<br>12.7 | Chile<br>11.2     | China<br>4.7     | Argentina<br>2.5  | Zimbabwe<br>1.0  | United States<br>0.87 | Portugal<br>0.57  | Brazil<br>0.4  |               |
| 2014              | Australia<br>13.3 | Chile<br>11.5     | Argentina<br>3.2 | China<br>2.3      | Zimbabwe<br>0.9  | Portugal<br>0.3       | Brazil<br>0.160   |                |               |
| 2015              | Australia<br>14.1 | Chile<br>10.5     | Argentina<br>3.6 | China<br>2.0      | Zimbabwe<br>0.9  | Portugal<br>0.2       | Brazil<br>0.2     |                |               |
| 2016              | Chile<br>14.3     | Australia<br>14.0 | Argentina<br>5.8 | China<br>2.3      | Zimbabwe<br>1.0  | Portugal<br>0.4       | Brazil<br>0.2     |                |               |
| 2017              | Australia<br>40.0 | Chile<br>14.2     | China<br>6.8     | Argentina<br>5.7  | Zimbabwe<br>0.8  | Portugal<br>0.8       | Brazil<br>0.2     |                |               |
| 2018              | Australia<br>58.8 | Chile<br>17.0     | China<br>7.1     | Argentina<br>6.4  | Canada<br>2.4    | Zimbabwe<br>1.6       | Portugal<br>0.8   | Namibia<br>0.5 | Brazil<br>0.3 |
| 2019              | Australia<br>45.0 | Chile<br>19.3     | China<br>10.8    | Argentina<br>6.3  | Brazil<br>2.4    | Zimbabwe<br>1.2       | Portugal<br>0.9   | Canada<br>0.2  |               |
| 2020              | Australia<br>39.7 | Chile<br>21.5     | China<br>13.3    | Argentina<br>5.9  | Brazil<br>1.42   | Zimbabwe<br>0.417     | Portugal<br>0.348 |                |               |
| 2021 <sup>b</sup> | Australia<br>55.0 | Chile<br>26.0     | China<br>14.0    | Argentina<br>6.2  | Brazil<br>1.5    | Zimbabwe<br>1.2       | Portugal<br>0.9   |                |               |

Source: USGS, *Mineral Commodity Summaries*, years 2012-2022; <sup>a</sup> US production was withheld in USGS totals except for 2013 “to avoid disclosing company proprietary data” <sup>b</sup> Estimate from 2022 edition
